# Supplementary material
Source: Springer Nature journal article supplement (https://www.springerprofessional.de/resource/supplementary/13638_2011_97_MOESM9_ESM.pdf/11897444)

**$P_i$        $P_{i+1}$        $P_{i+2}$        $P_{i+3}$**

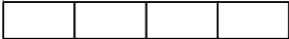

**Packet Drop**

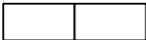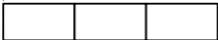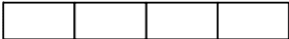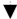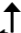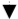

**Ack count**

Supplement: MOESM9 [file 11897444]
